# Supplementary material for: MET Receptor Tyrosine Kinase Regulates the Expression of Co-Stimulatory and Co-Inhibitory Molecules in Tumor Cells and Contributes to PD-L1-Mediated Suppression of Immune Cell Function
Source: MDPI journal article supplement (doi:10.3390/ijms20174287), 2019-09-01

# Supplementary Figure S1

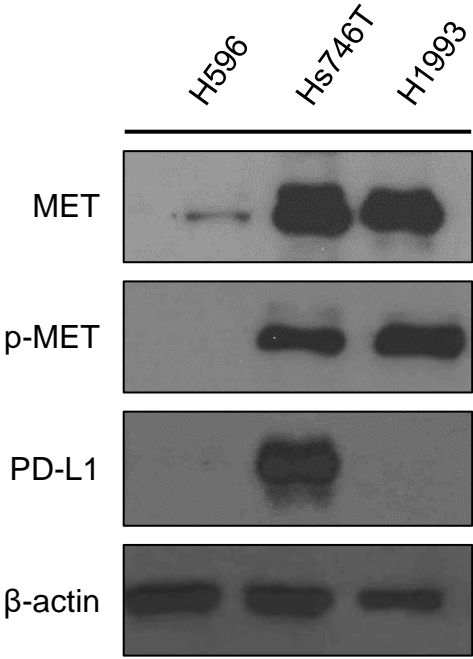

# Supplementary Figure S2

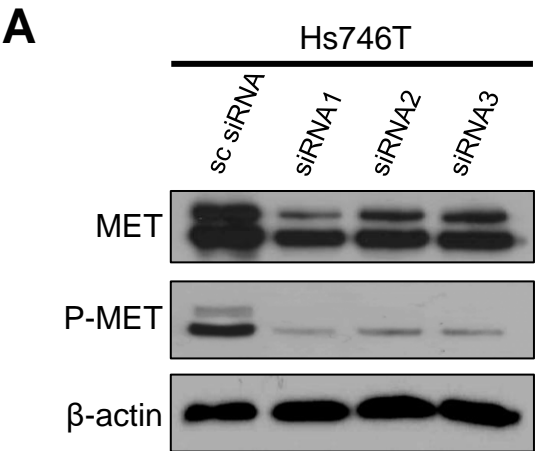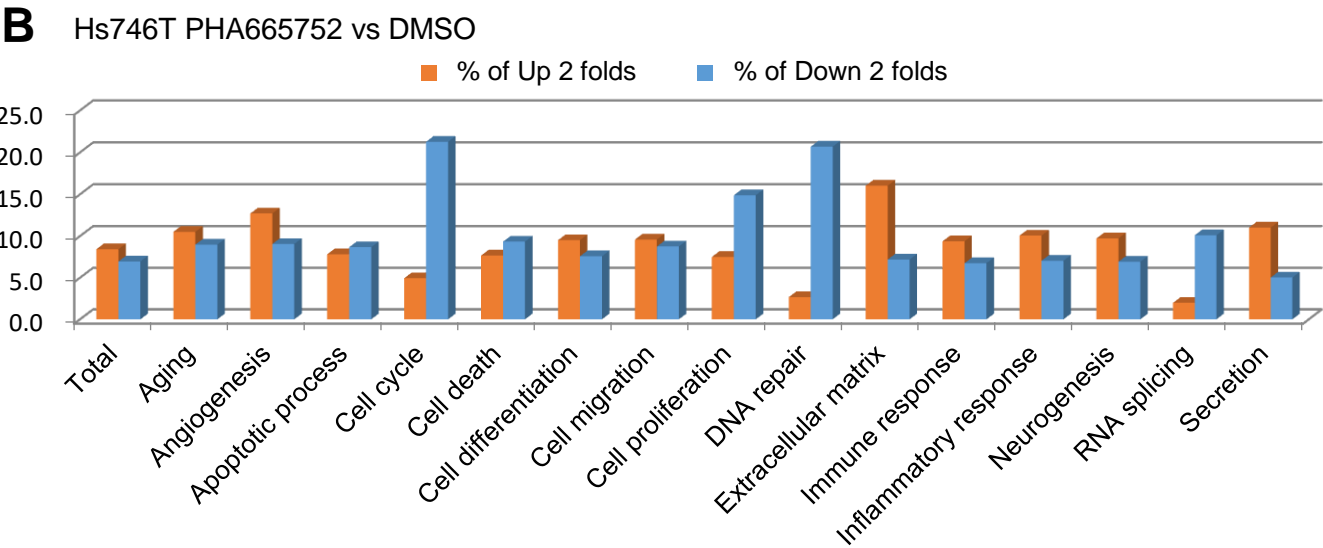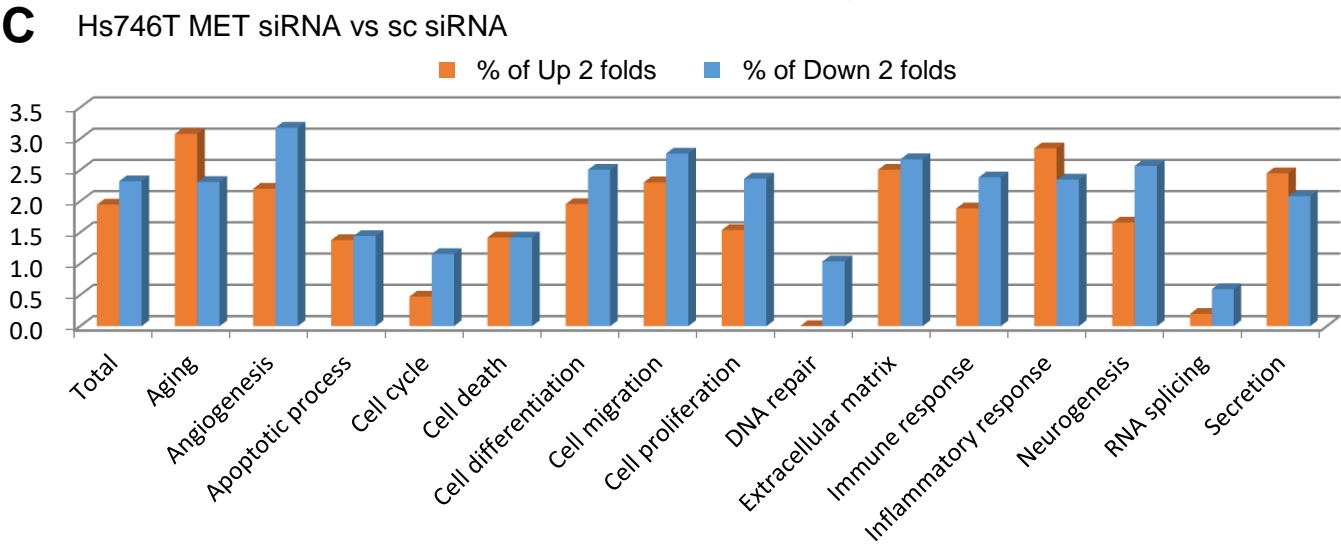

# Supplementary Figure S3

## A BEAS-2B

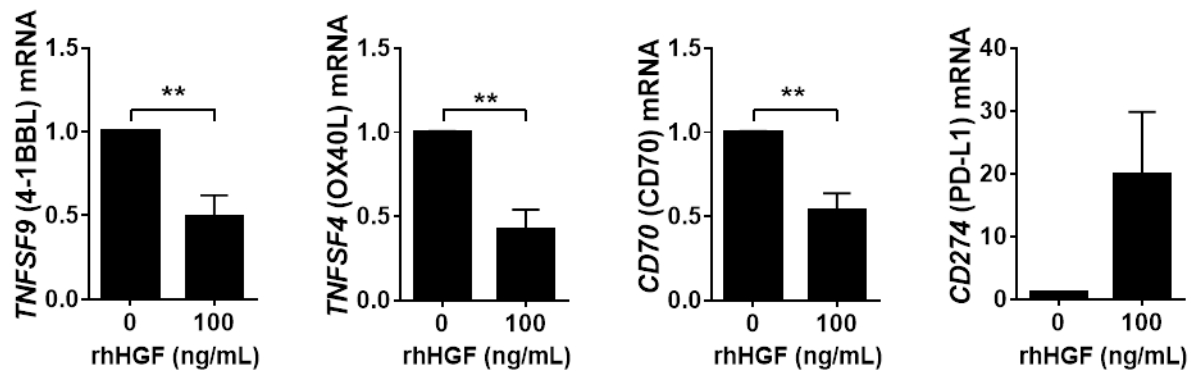

## B BEAS-2B

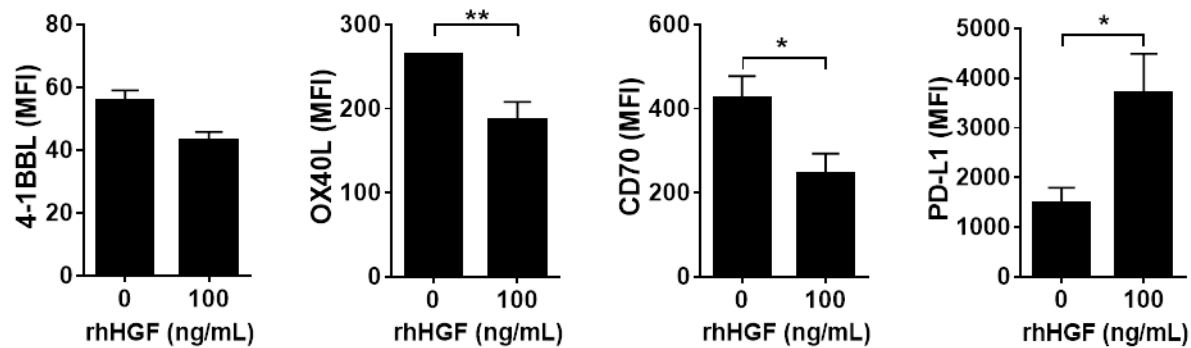

## C

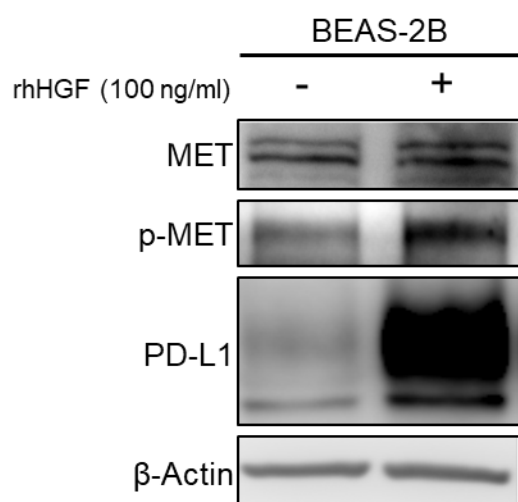

# Supplementary Figure S4

**A**

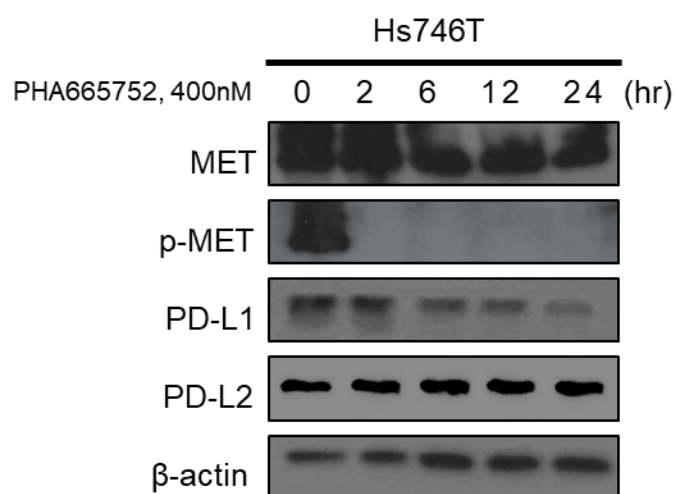

**B**

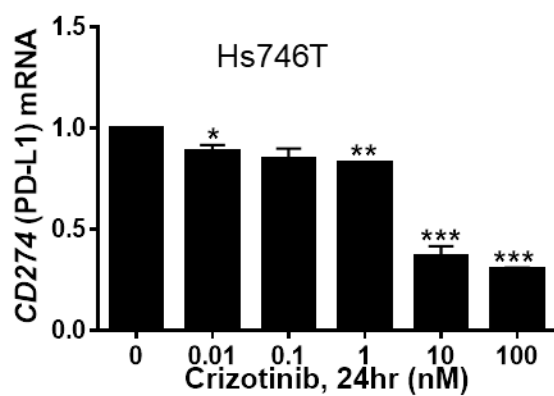

**C**

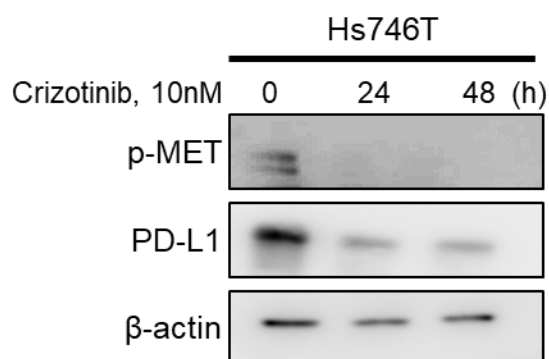

**D**

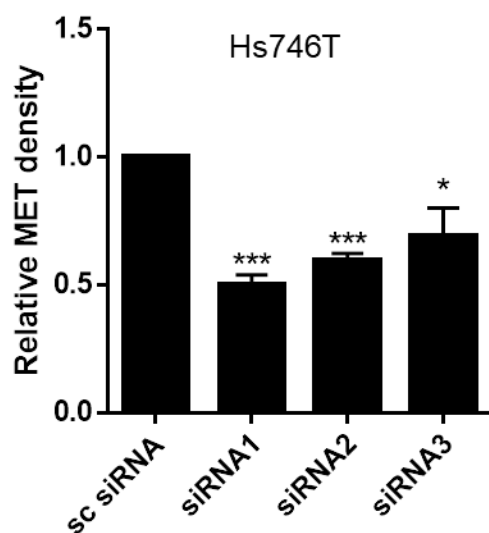

# Supplementary Figure S5

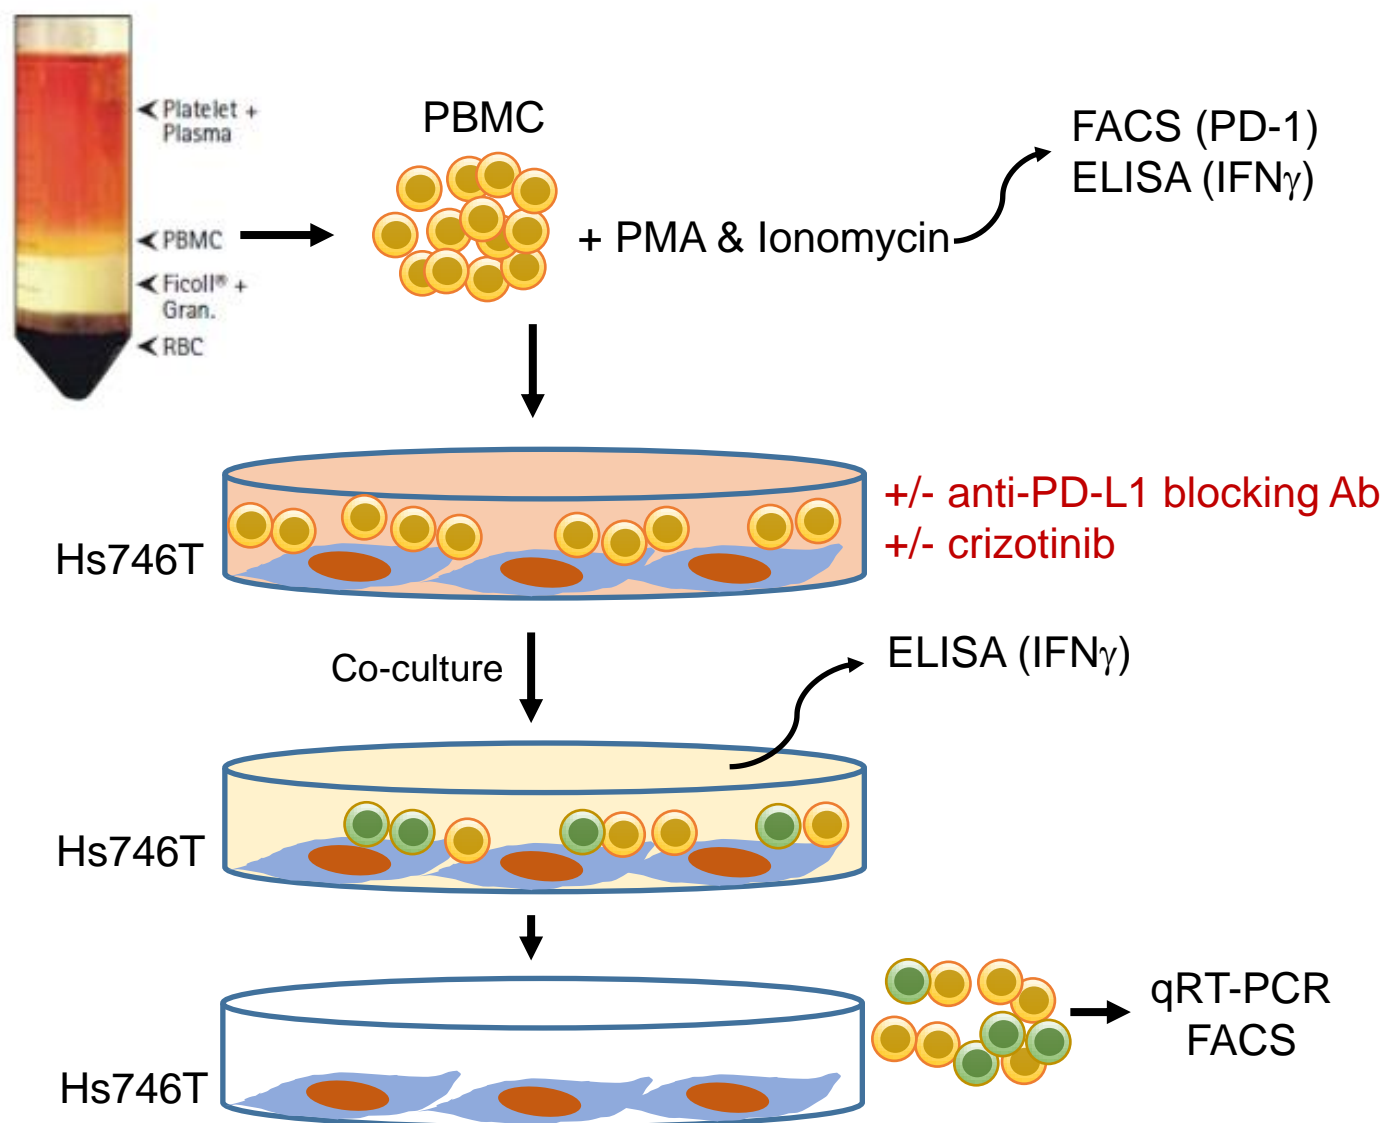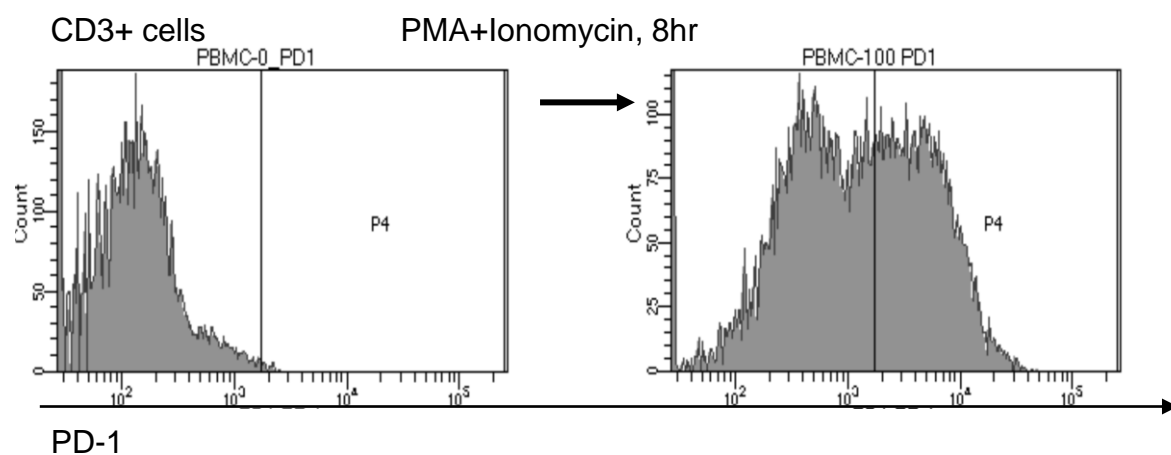

Supplementary Figure S6

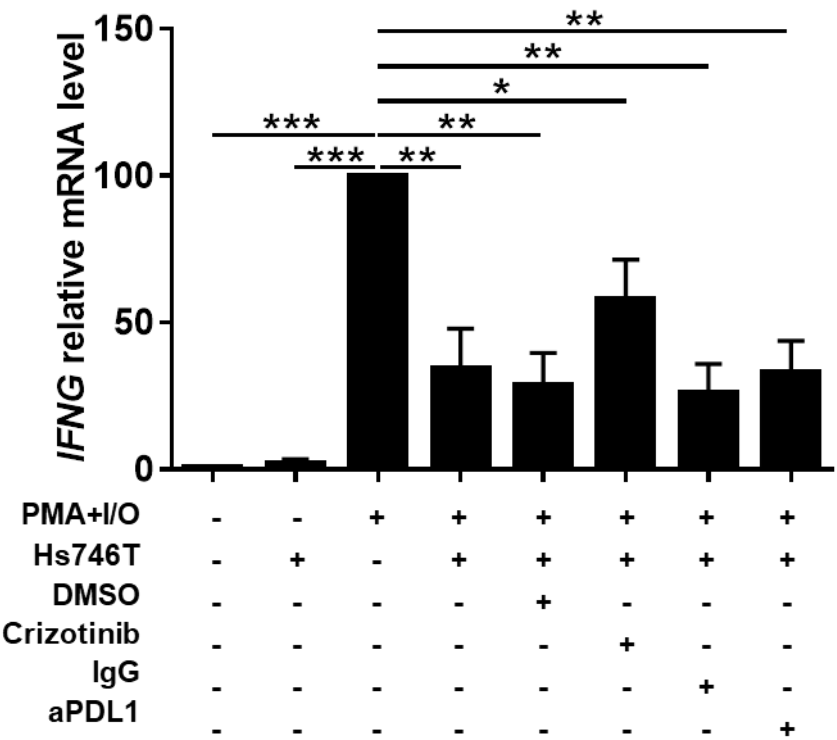

# Supplementary Figure S7

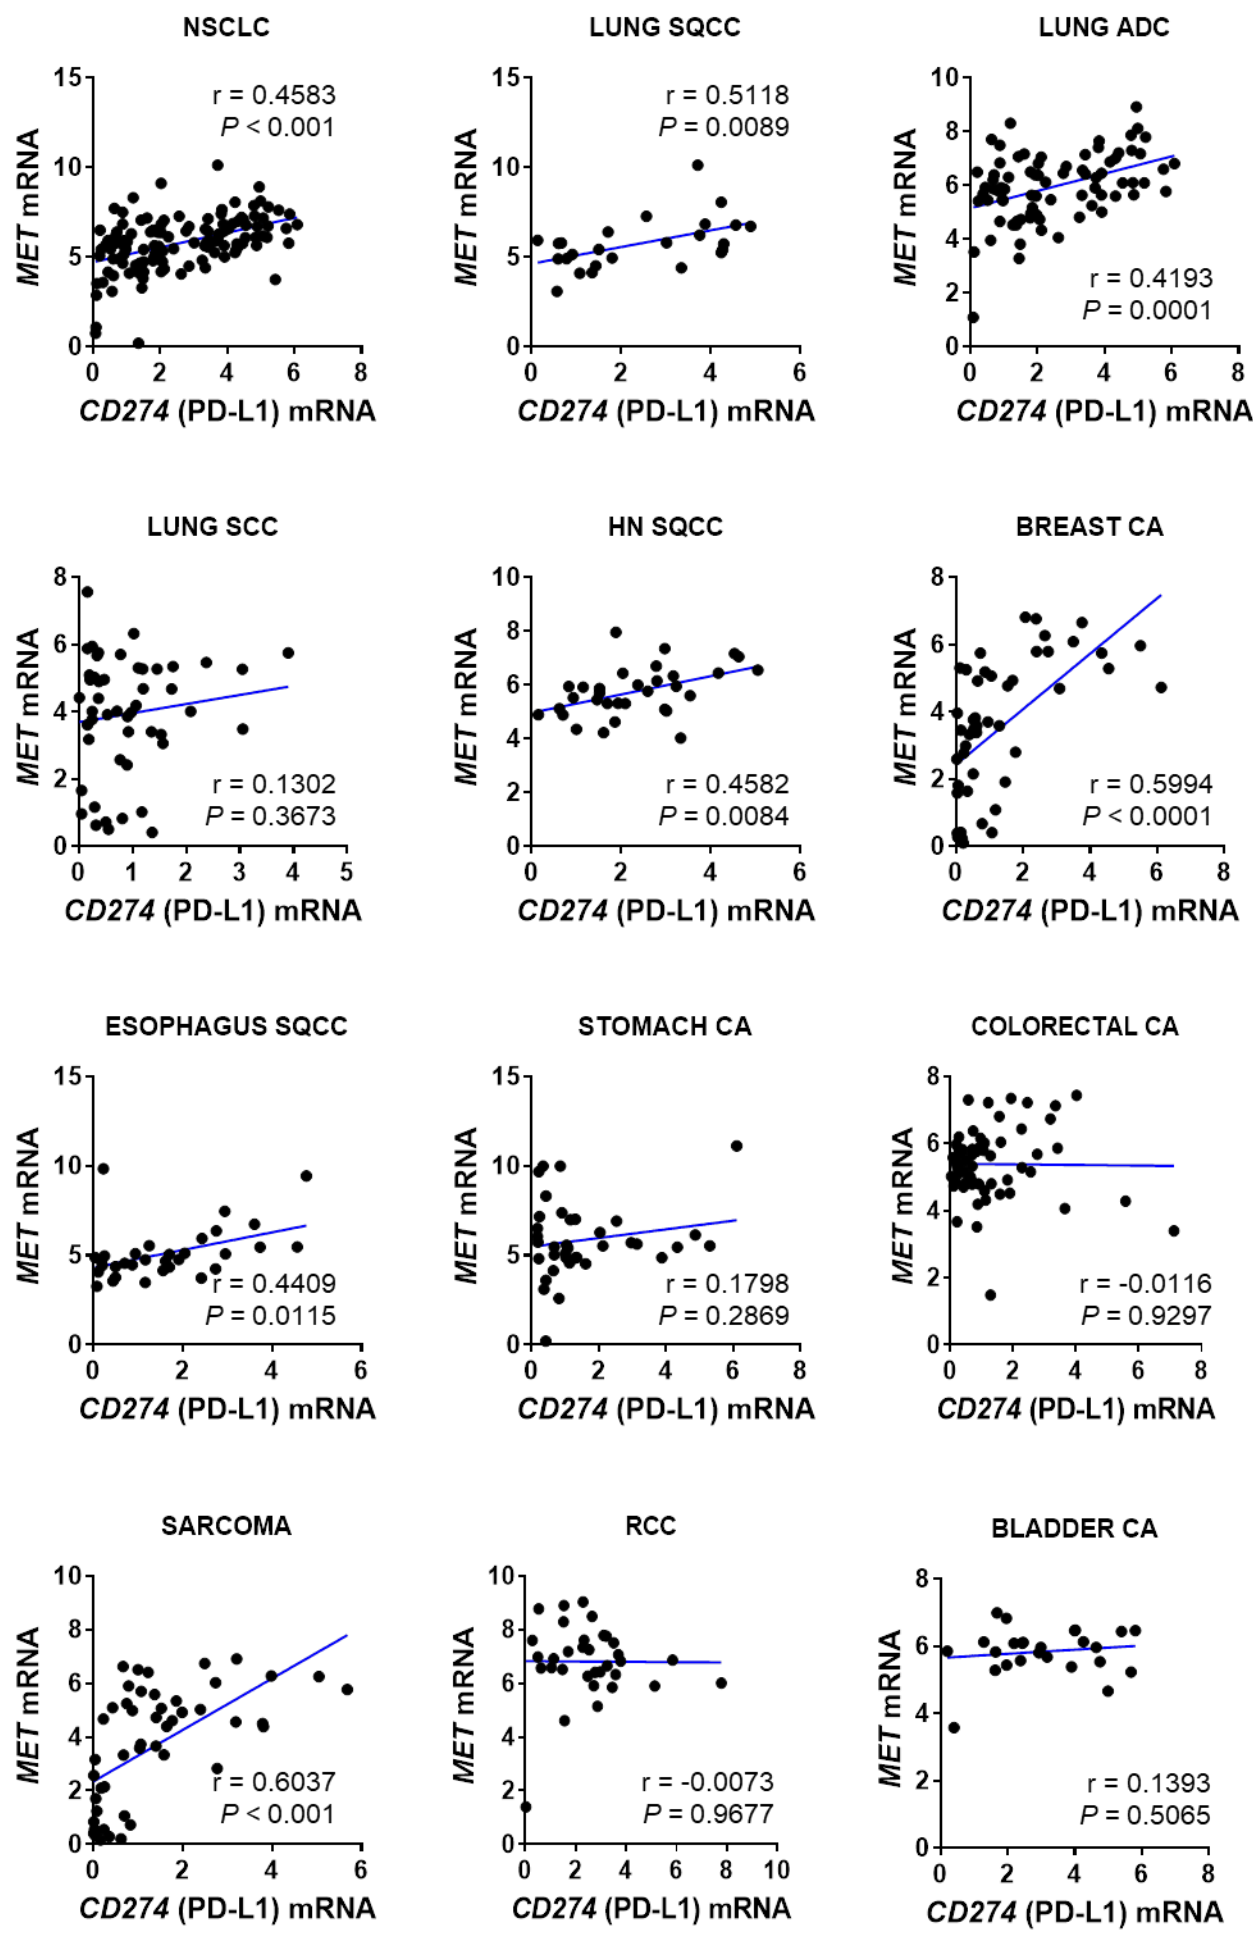

Supplement: s1 [file s1]
