# Supplementary material for: MET Receptor Tyrosine Kinase Regulates the Expression of Co-Stimulatory and Co-Inhibitory Molecules in Tumor Cells and Contributes to PD-L1-Mediated Suppression of Immune Cell Function
Source: MDPI journal article supplement (doi:10.3390/ijms20174287), 2019-09-01
Supplement: s1 [file s1]

## Supplementary Tables

**Supplementary Table S1. Sequences of Small Interfering RNAs for Transfection and Primers Used for qRT-PCR.**

| Small Interfering RNAs (siRNAs) |         |                                   |                             |
|---------------------------------|---------|-----------------------------------|-----------------------------|
| MET                             | siRNA-1 | sense                             | 5'-GAGCCAGCCUGAAUGAUGA-3'   |
|                                 |         | antisense                         | 5'-UCAUCAUUCAGGCUGGCUC-3'   |
|                                 | siRNA-2 | sense                             | 5'- GAACAGCGAGCUAAAUAUA -3' |
|                                 |         | antisense                         | 5'- UAUAUUUAGCUCGCUGUUC -3' |
|                                 | siRNA-3 | sense                             | 5'-GAACUGGUGUCCCGGAUAU-3'   |
|                                 |         | antisense                         | 5'- AUAUCCGGGACACCAGUUC -3' |
| Scrambled siRNA                 |         | sense                             | 5'-GGAGCAACGAGGAUUACCU-3'   |
|                                 |         | antisense                         | 5'-AGGUAAUCCUCGUUGCUC -3'   |
| Primers for qRT-PCR             |         |                                   |                             |
| MET                             | Forward | 5'-TGATGATGAGGTGGACACA-3'         |                             |
|                                 | Reverse | 5'-CTATGGCAAGGAGCAAAGA-3'         |                             |
| CD274 (PD-L1)                   | Forward | 5'-TATGGTGGTGGTGCCGACTACAA-3'     |                             |
|                                 | Reverse | 5'-TGGCTCCCAGAATTACCAAG-3'        |                             |
| TNFSF9 (4-1BBL)                 | Forward | CCTACATCTGCCTGCACTTCTC            |                             |
|                                 | Reverse | TGATGACTGAGTTGTTCTGCACC           |                             |
| TNFSF4 (OX-40L)                 | Forward | GGCGTCCATCTTCACACTGA              |                             |
|                                 | Reverse | CACCCAGGCTGGACGTTATT              |                             |
| CD70                            | Forward | GTCACTTGGGTGGGACGTAG              |                             |
|                                 | Reverse | GATGGATACGTAGCTGCCCC              |                             |
| IFNG (IFNγ)                     | Forward | 5'-CTAATTATTCGGTAACTGACTTGA-3'    |                             |
|                                 | Reverse | 5'-ACAGTTCAGCCATCACTTGGA-3'       |                             |
| GAPDH                           | Forward | 5'-CCCTTCATTGACCTACCTCAACTACAT-3' |                             |
|                                 | Reverse | 5'-ACGATACCAAAGTTGTCATGGAT-3'     |                             |

**Supplementary Table S2. Clinicopathological Parameters of Patients with NSCLC.**

| <b>Clinicopathological Parameter</b> | <b>Adenocarcinoma<br/>(<i>n</i> = 789) (%)</b> |
|--------------------------------------|------------------------------------------------|
| Median age at surgery (range)        | 65 (23 -88)                                    |
| Sex                                  |                                                |
| Male                                 | 567 (71.9)                                     |
| Female                               | 222 (28.1)                                     |
| Smoking*                             |                                                |
| Never                                | 262 (34.0)                                     |
| Ever                                 | 509 (66.0)                                     |
| Histology                            |                                                |
| Adenocarcinoma                       | 387 (49.0)                                     |
| Squamous cell carcinoma              | 385 (48.8)                                     |
| Others                               | 17 (2.2)                                       |
| T stage*                             |                                                |
| T1                                   | 270 (34.3)                                     |
| T2                                   | 386 (49.0)                                     |
| T3                                   | 88 (11.2)                                      |
| T4                                   | 44 (5.5)                                       |
| N stage*                             |                                                |
| N0                                   | 499 (63.8)                                     |
| N1-2                                 | 283 (36.2)                                     |
| Stage*                               |                                                |
| I                                    | 370 (47.3)                                     |
| II                                   | 207 (26.5)                                     |
| III                                  | 180 (23.0)                                     |
| IV                                   | 25 (3.2)                                       |
| <i>EGFR</i> mutation*                |                                                |
| No mutation                          | 325 (63.6)                                     |
| Mutation                             | 186 (36.4)                                     |
| <i>KRAS</i> mutation*                |                                                |
| No mutation                          | 112 (90.3)                                     |
| Mutation                             | 12 (9.7)                                       |
| <i>ALK</i> translocation*            |                                                |
| No translocation                     | 511 (96.1)                                     |
| Translocation                        | 21 (3.9)                                       |
| <i>MET</i> FISH*                     |                                                |
| Others                               | 226 (64.6)                                     |
| High polysomy                        | 99 (28.3)                                      |
| Amplification                        | 25 (7.1)                                       |
| MET IHC                              |                                                |
| 0                                    | 516 (65.4)                                     |
| 1                                    | 154 (19.5)                                     |

|                 |            |
|-----------------|------------|
| 2               | 89 (11.3)  |
| 3               | 30 (3.8)   |
| PD-L1 IHC score |            |
| 0               | 139 (17.6) |
| 1               | 304 (38.5) |
| 2               | 274 (34.7) |
| 3               | 72 (9.1)   |
| PD-L2 IHC score |            |
| 0               | 141 (17.9) |
| 1               | 309 (39.2) |
| 2               | 262 (33.2) |
| 3               | 77 (9.8)   |

---

\* Some cases have missing values.

## Supplementary Figure Legends

**Supplementary Figure S1. Basal expression of MET, p-MET and PD-L1 in cancer cell lines.** Basal expressions of MET, p-MET, and PD-L1 were evaluated using western blot in H596, Hs746T, and H1993 cells.

**Supplementary Figure S2. Gene Ontology (GO) analysis of the genes up- or down-regulated by MET suppression in Hs746T cells.** Hs746T cells were treated with a MET inhibitor PHA665752 or transfected with MET-specific siRNA1. **(A)** The efficacies of MET-specific siRNAs were determined by western blot. A sample transfected with MET-specific siRNA1 was submitted to microarray analysis. **(B)** GO analysis for the genes significantly changed more than 2-fold by PHA665752 treatment compared to DMSO treatment (as a control). **(C)** GO analysis for genes significantly changed more than 2-fold by MET siRNA transfection compared to sc siRNA transfection (as a control). The bar graphs represent the percentages of significantly up- (orange) or down-regulated (blue) genes in each gene set.

**Supplementary Figure S3. Changes in The Expression of Co-Stimulatory and Co-Inhibitory Molecules in Human Non-Neoplastic Bronchial Epithelial Cells After rhHGF Treatment.** **(A)** BEAS-2B cells maintained in serum-free medium for 6 h were treated with 100 ng rhHGF/mL for 12 h. The changes of *TNFSF9* (4-1BBL), *TNFSF4* (OX40L), *CD70*, and *CD274* (PD-L1) mRNA expression were then determined by qRT-PCR. **(B)** The surface expression of these molecules were analyzed by flow cytometry and mean fluorescence intensity (MFI) was plotted. **(C)** The changes in MET, p-MET, and PD-L1 total protein expression were examined by western blot. Data represent the mean  $\pm$  SEM of at least three independent experiments **(A–B)**. All *p* values were calculated using unpaired Student's *t*-tests. \* *p* < 0.05, \*\* *p* < 0.01.

**Supplementary Figure S4. Changes in co-stimulatory and co-inhibitory molecules in human cancer cells after MET inhibitors treatment or MET-specific siRNA transfection.** (A) Hs746T cells were treated with 400 nM PHA665752 (a MET inhibitor) for 24 h. Changes in total MET, p-MET, PD-L1, and PD-L2 protein expression were analyzed by western blot. (B) Hs746T cells were treated with crizotinib (a MET inhibitor) at the indicated concentrations for 24 h and the changes in *CD274* (PD-L1) mRNA expression were determined by qRT-PCR. (C) Hs746T cells were treated with 10 nM crizotinib for indicated times and the changes in PD-L1 protein expression were analyzed by western blot. (D) Changes in total MET expression in Hs746T cells transfected with MET-specific siRNAs were analyzed by western blot and quantified by densitometry. The relative mRNA levels of molecules are presented as the fold-change compared to the control ( $2^{-\Delta\Delta Ct}$ ). Data are presented as the mean  $\pm$  SEM of at least three independent experiments or are representative of three independent experiments. All *p* values were calculated using unpaired Student's *t*-tests. \* *p* < 0.05, \*\* *p* < 0.01, \*\*\* *p* < 0.001.

**Supplementary Figure S5. Schematic procedure of co-culture experiment.** Procedure of co-culture experiment using peripheral blood mononuclear cells (PBMCs) and Hs746T cells is schematically depicted in upper panel. PBMCs were activated with 50 ng PMA/mL and 1  $\mu$ g ionomycin/mL for 8 h. Surface expression of PD-1 on T cells was determined by flow cytometry (CD3<sup>+</sup> T cell gating by APC-conjugated anti-CD3 antibody) (lower).

**Supplementary Figure S6. Co-culture of PBMCs and MET<sup>high</sup>/PD-L1<sup>high</sup> Hs746T cells.** PBMCs were stimulated by PMA and ionomycin, as in Supplementary Figure S5. Hs746T cells pre-treated for 24 h with 10 nM crizotinib or 40  $\mu$ g anti-PD-L1 blocking antibody/mL were co-culture with stimulated PBMCs for 16 h. PBMCs were harvested and expression of IFN $\gamma$  mRNA was analyzed by qRT-PCR. Relative levels of IFN $\gamma$  mRNA are presented as the fold-change compared to the control ( $2^{-\Delta\Delta Ct}$ ). Data

are presented as the mean  $\pm$  SEM of at least three independent experiments. All  $p$  values were calculated using unpaired Student's  $t$ -tests. \*  $p < 0.05$ , \*\*  $p < 0.01$ , \*\*\*  $p < 0.001$ .

**Supplementary Figure S7. Correlations between MET and PD-L1 expression in human cancer cell lines from Cancer Cell Line Encyclopedia (CCLE).** The correlation between MET and *CD274* (PD-L1) mRNA levels was analyzed in human cancer cell lines from Cancer Cell Line Encyclopedia (CCLE) according to the cancer types. The statistical significance was calculated using a Pearson's correlation analysis. Abbreviation: ADC, adenocarcinoma; CA, carcinoma; HN, head and neck; NSCLC, non-small cell lung cancer; RCC, renal cell carcinoma; SCC, small cell carcinoma; SQCC, squamous cell carcinoma.
